# Supplementary material for: A Size-determining Supergene Hampers a Vulnerable Population Recovery
Source: Research Square preprint supplement (doi:10.21203/rs.3.rs-4107339/v1), 2024-05-22
Supplement: Supplementary file 1 [file 096ebc4a1c63ba45f999fc81.docx]

**Table S2.** Maximum Likelihood (ML) value of parameters estimated for the five demographic models and 95% confidence interval associated for the IMM-5-CH-STOP. AIC value of the best run under each model is reported.

|  | IMM-20 | IMM-30 | IMM-5 | IMM-5-NM-CH | IMM-5-NM-STOP |
| --- | --- | --- | --- | --- | --- |
| NANC | 103270 | 104630 | 99492 | 100752 | 101095 |
| (99116-106634) |
| NEAST | 16316 | 16587 | 79910 | 77862 | 79941 |
| (74595-81106) |
| NWEST | 24996 | 12459 | 82112 | 78452 | 81621 |
| (78482-90962) |
| NmE-W | 2.77 | 2.65 | 2.35 | 4.69 | 5.09 |
| (4.88-13.73) |
| NmW-E | 0.78 | 0.88 | 0.86 | 1.97 | 1.54 |
| (1.69-5.56) |
| NmE-W-MOD | - | - | - | 0.5 | - |
|  |
| NmW-E-MOD | - | - | - | 0.005 | - |  |
|  |
| NmW | 121.92 | 161.05 | 44.86 | 65.31 | 60.64 |  |
| (49.67-124.05) |  |
| NmE | 165.29 | 251.83 | 101.49 | 120.07 | 117.69 |  |
| (76.74-144.91) |  |
| TCH1 | - | - | - | 141174 | 160677 |  |
| (46871-163108) |  |
| TDIV1 | 872344 | 861399 | 928092 | 931645 | 890714 |  |
| (799964-919941) |  |
| AIC | 1511534769 | 1511569382 | 1511382039 | 1510516765 | 1510483219 |  |

1Times are expressed in year (converted using a generation time of 11 years).
