# Supplementary material for: A Size-determining Supergene Hampers a Vulnerable Population Recovery
Source: Research Square preprint supplement (doi:10.21203/rs.3.rs-4107339/v1), 2024-05-22
Supplement: Supplementary file 2 [file 21ff6d669b167a25254530cc.docx]

**Table 1.** **Summary statistics for each sampling location**. Number of individuals sampled for the whole genome study (NWG) and the screening study (NSC). For each sampling location with NWG ≥ 5: total number of SNPs (NSNPs), total number of sites (Nsites), mean pairwise difference (θπ) and Watterson’s estimator of genetic diversity (θw) both scaled by Nsites and Tajima’s D (TD). For sampling sites included in the screening study (NSC>0), total number of individuals carrying each genotype (NHBHB, NHBHS, NHSHS) and HB allele frequency (*f*HB). Number of individuals carrying each genotype in bold are not in Hardy-Weinberg equilibrium (HW exact-test: p<0.001).

|  |  | NWG | NSC | NSNPs | Nsites | θπ | θw | TD | NHB/HB | NHB/HS | NHS/HS | *f*HB |
| --- | --- | --- | --- | --- | --- | --- | --- | --- | --- | --- | --- | --- |
| NWA | GoM | 16 | 284 | 13,926,040 | 439,435,032 | 0.0063 | 0.0079 | -0.7903 | **78**  **(f=0.27)** | **10**  **(f=0.04)** | **196**  **(f=0.69)** | 0.29 |
| CAN | 5 | 40 | 11,872,562 | 604,725,402 | 0.0063 | 0.0069 | -0.4877 | 4  (*f*=0.09) | 23  (*f*=0.58) | 13  (*f*=0.33) | 0.39 |
|  |  |  |  |  |  |  |  |  |  |  |  |  |
| NEA | SW-G | 2 | 7 | - | - | - | - | - | 0  (*f*=0) | 0  (*f*=0) | 7  (*f*=1) | 0 |
| SE-G | 3 | 0 | - | - | - | - | - | - | - | - | - |
| E-GR | 2 | 2 | - | - | - | - | - | 0  (*f*=0) | 0  (*f*=0) | 2  (*f*=1) | 0 |
| W-IC | 5 | 50 | 10,275,797 | 558,262,795 | 0.0058 | 0.0065 | -0.5318 | 0  (*f*=0) | 0  (*f*=0) | 50  (*f*=1) | 0 |
| E-IC | 5 | 34 | 9,982,473 | 535,940,022 | 0.0059 | 0.0066 | -0.5212 | 0  (*f*=0) | 0  (*f*=0) | 34  (*f*=1) | 0 |
| W-NW | 1 | 0 | - | - | - | - | - | - | - | - | - |
| S-NW | 1 | 5 | - | - | - | - | - | 0  (*f*=0) | 0  (*f*=0) | 5  (*f*=1) | 0 |
| N-NW | 9 | 47 | 12,708,852 | 538,100,423 | 0.0057 | 0.0069 | -0.6983 | 0  (*f*=0) | 0  (*f*=0) | 47  (*f*=1) | 0 |
