# Supplementary material for: A Size-determining Supergene Hampers a Vulnerable Population Recovery
Source: Research Square preprint supplement (doi:10.21203/rs.3.rs-4107339/v1), 2024-05-22
Supplement: Supplementary file 3 [file b0ca89218bc4ebe21b413121.docx]

**Table S1.** Median values and associated 95% credibility intervals of size estimates (in cm) averaged over the levels of other factors for the three linear models tested: Haplo (“Size ~ Genotype”), HaploMat (“Size ~ Genotype + Maturity”) and HaploMatSex (“Size ~ Genotype + Maturity + Sex”). The Expected Log Pointwise Predictive Density resulting from the Leave-One-Out cross-validation step is indicated for each model.

| Parameter | Level | Haplo | HaploMat | HaploMatSex |
| --- | --- | --- | --- | --- |
| Genotype | HB/HB | 60.31 | 66.95 | 67.15 |
| [57.93; 62.73] | [64.81; 69.28] | [64.99; 69.49] |
| HB/HS | 57.23 | 65.64 | 65.43 |
| [51.34; 63.04] | [60.70; 70.55] | [60.74; 70.47] |
| HS/HS | 47.59 | 50.69 | 50.81 |
| [46.10; 49.98] | [49.28; 52.10] | [49.35; 52.18] |
| Maturity | 1 | - | 51.54 | 51.49 |
| [49.78; 53.40] | [49.56; 53.25] |
| 2 | - | 58.9 | 58.75 |
| [55.67; 62.16] | [55.47; 61.95] |
| 3 | - | 62.76 | 62.61 |
| [60.34; 65.31] | [60.15; 65.15] |
| 4 | - | 71.19 | 71.67 |
| [67.00; 75.36] | [67.41; 75.83] |
| Sex | Female | - | - | 61.69 |
| [59.33; 63.89] |
| Male | - | - | 60.56 |
| [58.26; 62.75] |
| ELPD1 |  | -1454.96 | -1397.70 | -1397.95 |

1Expected Log Pointwise predictive Density (ELPD) by the Leave-One-Out (LOO) cross-validation step.
